# Supplementary material for: Hybridization chain reaction-enhanced enzyme biomineralization for ultrasensitive colorimetric biosensing of a protein biomarker
Source: Royal Society of Chemistry journal article supplement (doi:10.1039/c9an00898e), 2019-01-01
Supplement: c9an00898e1.pdf [file c9an00898e1.pdf]

Electronic Supplementary Information (ESI) for Analyst

This journal is (c) The Royal Society of Chemistry 2019

**Hybridization chain reaction-enhanced enzyme-biomineralization  
for ultrasensitive colorimetric biosensing of a protein biomarker**

Bo Li,<sup>a</sup> Lu Qin,<sup>a</sup> Jie Zhou,<sup>a</sup> Xiaolei Cai,<sup>a</sup> Guosong Lai<sup>\*a</sup> and Aimin Yu<sup>a,b</sup>

*<sup>a</sup>Hubei Key Laboratory of Pollutant Analysis & Reuse Technology, Department of  
Chemistry, Hubei Normal University, Huangshi 435002, PR China*

*<sup>b</sup>Department of Chemistry and Biotechnology, Faculty of Science, Engineering and  
Technology, Swinburne University of Technology, Hawthorn VIC 3122, Australia*

**\* Corresponding Author.**

Tel.: +86-714-6515602

*E-mail:* gslai@hbnu.edu.cn (G. Lai)

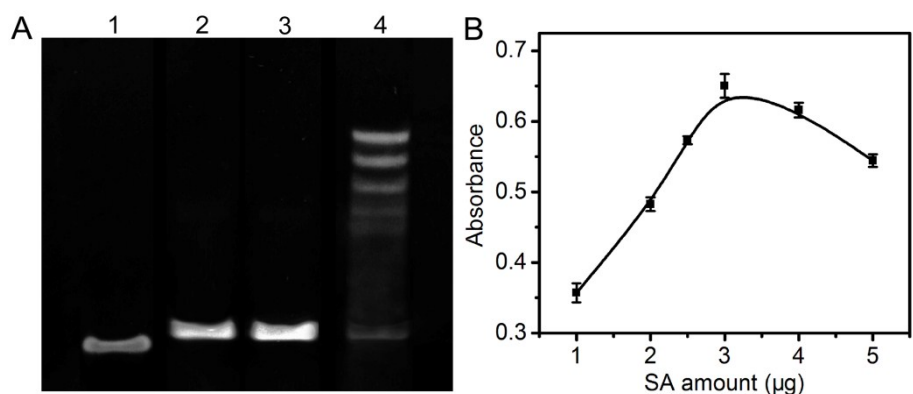

**Fig. S1** (A) PAGE images of different samples: CEA-aptamer (lane 1), H1 (lane 2), H2 (lane 3), and the reaction products of the mixture of CEA-aptamer, H1 and H2; (B) Effect of the SA amount used for the Au NP nanotag preparation on the absorbance response of 50 ng mL<sup>-1</sup> CEA.

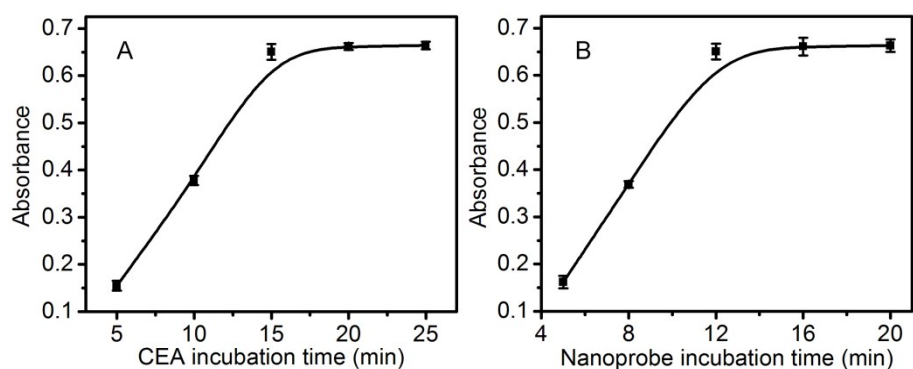

**Fig. S2** Effects of the incubation time of CEA (A) and nanoprobe (B) on the absorbance responses of 50 ng mL<sup>-1</sup> CEA.

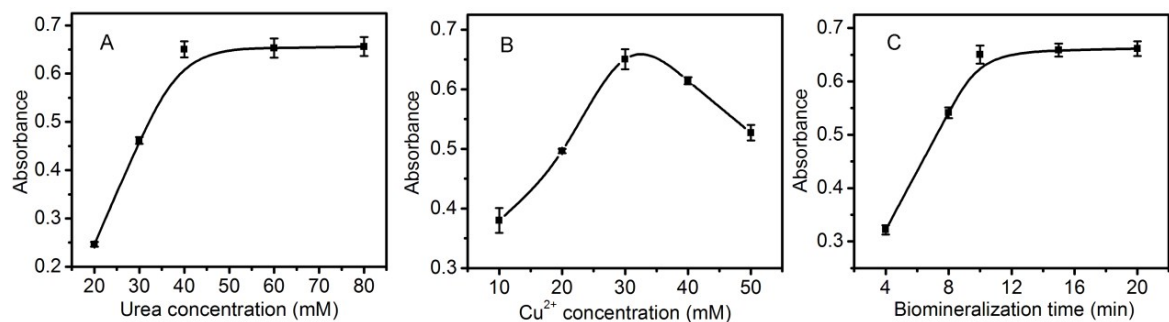

**Fig. S3** Effects of the concentrations of urea (A) and Cu<sup>2+</sup> (B), and the biom mineralization time (C) on the absorbance responses of 50 ng mL<sup>-1</sup> CEA.

**Table S1** An overview on the specific features of the proposed method and their comparison with several biosensing methods previously reported for CEA analysis.

| Signal transduction strategy                                                                     | Detection method | Linear range                                    | LOD                       | Ref.      |
|--------------------------------------------------------------------------------------------------|------------------|-------------------------------------------------|---------------------------|-----------|
| Enzymatic chromogenic reaction by HRP-labeled antibody-functionalized Au NPs                     | Colorimetry      | 2–40 ng mL <sup>-1</sup>                        | 0.02 ng mL <sup>-1</sup>  | 9         |
| Enzyme-induced biomineralization of copper ions by urease-functionalized Au NPs                  | Colorimetry      | 1 pg mL <sup>-1</sup> –100 ng mL <sup>-1</sup>  | 0.45 pg mL <sup>-1</sup>  | 16        |
| DNAzyme chromogenic reaction based on biobarcode and enzyme-assisted DNA recycling amplification | Colorimetry      | 0.025–40 ng mL <sup>-1</sup>                    | 0.025 ng mL <sup>-1</sup> | 35        |
| Catalytic chromogenic reaction by ZnFe <sub>2</sub> O <sub>4</sub> @MWCNTs nanocomposite         | Colorimetry      | 5 pg mL <sup>-1</sup> –30 ng mL <sup>-1</sup>   | 2.6 pg mL <sup>-1</sup>   | 36        |
| Enzymatic chromogenic reaction by HRP at a paper-based microfluidic immunodevice                 | Colorimetry      | 0.1–20 ng mL <sup>-1</sup>                      | 0.03 ng mL <sup>-1</sup>  | 37        |
| Catalytic chromogenic reaction by Pd/Fe <sub>3</sub> O <sub>4</sub> @C peroxidase mimetics       | Colorimetry      | 5 pg mL <sup>-1</sup> –30 ng mL <sup>-1</sup>   | 1.7 pg mL <sup>-1</sup>   | 38        |
| Label-free bioassay at a graphene/Au NPs based immunosensor                                      | EIS              | 0.1–1000 ng mL <sup>-1</sup>                    | 0.06 ng mL <sup>-1</sup>  | 39        |
| Electrocatalytic reaction of HRP at a nitrogen-doped graphene based immunosensor                 | DPV              | 0.02–12 ng mL <sup>-1</sup>                     | 0.01 ng mL <sup>-1</sup>  | 40        |
| Electrocatalytic reaction of Au@Pt DNs/NG/Cu <sup>2+</sup> nanocomposite                         | Amperometry      | 0.5 pg mL <sup>-1</sup> –50 ng mL <sup>-1</sup> | 0.167 pg mL <sup>-1</sup> | 41        |
| HCR-enhanced biomineralization of copper ions                                                    | Colorimetry      | 0.1 pg mL <sup>-1</sup> –50 ng mL <sup>-1</sup> | 0.071 pg mL <sup>-1</sup> | This work |

HRP: horseradish peroxidase; MWCNT: multi-walled carbon nanotube; EIS: electrochemical impedance spectroscopy; DPV: differential pulse voltammetry; Au@Pt DNs/NG/Cu<sup>2+</sup>: Cubic Au@Pt dendritic nanomaterials-functionalized nitrogen-doped graphene loaded with Cu<sup>2+</sup>

**Table S2** Comparison on the CEA analyzed results of human serum samples by using the proposed and reference methods (ng mL<sup>-1</sup>).

| Sample no.               | 1           | 2          | 3           |
|--------------------------|-------------|------------|-------------|
| Reference method         | 13.05       | 0.50       | 0.050       |
| Proposed method (RSD, %) | 12.93 (2.4) | 0.47 (3.3) | 0.052 (2.5) |
| Relative error (%)       | -0.92       | -6.0       | 4.0         |
